# Supplementary material for: Proton transfer in polyamine–P2Mo5 model adducts: exploring the effect of polyamine cations on their proton conductivity
Source: Royal Society of Chemistry journal article supplement (doi:10.1039/d0dt03446k), 2020-01-01
Supplement: d0dt03446k1.pdf [file d0dt03446k1.pdf]

## Supporting information

### **Proton transfer in polyamine- $P_2Mo_5$ model adducts: exploring the effect of polyamine cations on their proton conductivity**

Shan Zhang, Ying Lu, \* Xiuwei Sun, Zhuo Li, Tianyi Dang and Shuxia Liu \*

*Key Laboratory of Polyoxometalate Science of Ministry of Education, Northeast Normal University, Changchun, Jilin, 130024 (China).*

\*Corresponding author. E-mail address: [liusx@nenu.edu.cn](mailto:liusx@nenu.edu.cn), [luy968@nenu.edu.cn](mailto:luy968@nenu.edu.cn)

### **Content**

**Fig. S1** The IR spectrum of  $P_2Mo_5$ -TETA.

**Fig. S2** The IR spectrum of  $P_2Mo_5$ -DETA.

**Fig. S3** The IR spectrum of  $P_2Mo_5$ -EN.

**Fig. S4.** Arrhenius plots of the proton conductivity of  $P_2Mo_5$ -EN, cycle 1 (black); cycle 2 (red); cycle 3 (blue).

**Fig. S5** The original and after proton conduction IR spectra of  $P_2Mo_5$ -TETA.

**Fig. S6** The original and after proton conduction IR spectra of  $P_2Mo_5$ -DETA.

**Fig. S7** The original and after proton conduction IR spectra of  $P_2Mo_5$ -EN.

**Fig. S8** PXRD profiles of single crystal data simulation for  $P_2Mo_5$ -TETA; as-synthesized of  $P_2Mo_5$ -TETA;  $P_2Mo_5$ -TETA after proton conduction test.

**Fig. S9** PXRD profiles of single crystal data simulation for  $P_2Mo_5$ -DETA; as-synthesized of  $P_2Mo_5$ -DETA;  $P_2Mo_5$ -DETA after proton conduction test.

**Fig. S10** PXRD profiles of single crystal data simulation for  $P_2Mo_5$ -EN; as-synthesized of  $P_2Mo_5$ -EN;  $P_2Mo_5$ -EN after proton conduction test.

**Fig. S11** The possible proton transport pathway of A and B in adduct  $P_2Mo_5$ -DETA along the b-axis.

**Fig. S12** The possible proton transport pathway of A and B in adduct  $P_2Mo_5$ -TETA along the b-axis.

**Table S1** X-ray crystallographic data for  $P_2Mo_5$ -TETA and  $P_2Mo_5$ -DETA.

**Table S2** Hydrogen bond distances (Å) and angles (°) for  $P_2Mo_5$ -TETA.

**Table S3** Hydrogen bond distances (Å) and angles (°) for  $P_2Mo_5$ -DETA.

**Table S4** Hydrogen bond distances (Å) and angles (°) for  $P_2Mo_5$ -EN.

**Table S5** The short O···O distances between adjacent P<sub>2</sub>Mo<sub>5</sub> anions in **P<sub>2</sub>Mo<sub>5</sub>-EN**.

**Table S6** Compare proton conductivity of **P<sub>2</sub>Mo<sub>5</sub>-EN** with that of other conductors under similar conditions.

**Table S7** The relatively short O···O distances between adjacent P<sub>2</sub>Mo<sub>5</sub> anions in the A pathway of **P<sub>2</sub>Mo<sub>5</sub>-TETA**, where the oxygen atoms involved can provide potential proton hop sites.

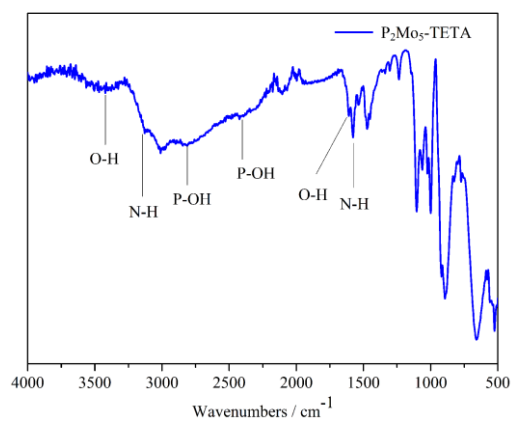

**Fig. S1** The IR spectrum of  $P_2Mo_5$ -TETA.

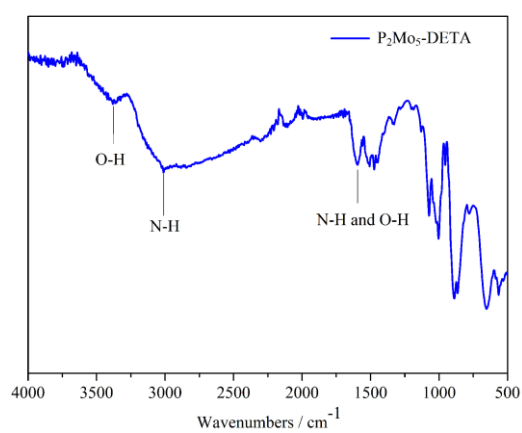

**Fig. S2** The IR spectrum of  $P_2Mo_5$ -DETA.

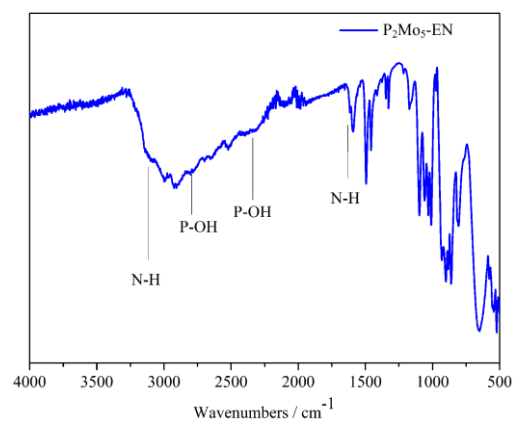

**Fig. S3** The IR spectrum of  $P_2Mo_5$ -EN.

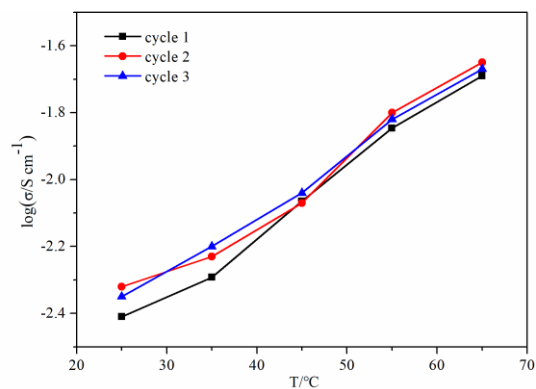

**Fig. S4.** Arrhenius plots of the proton conductivity of **P<sub>2</sub>Mo<sub>5</sub>-EN**, cycle 1 (black); cycle 2 (red); cycle 3 (blue).

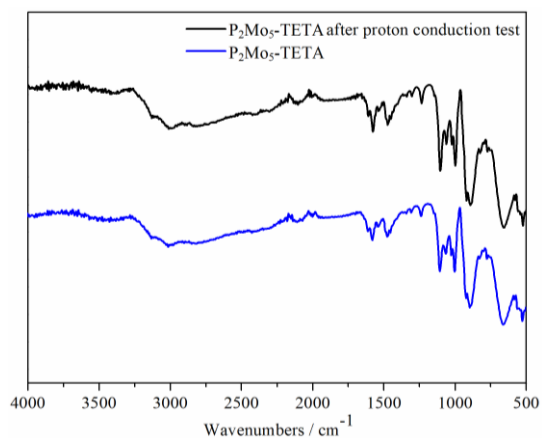

**Fig. S5** The original and after proton conduction IR spectra of **P<sub>2</sub>Mo<sub>5</sub>-TETA**.

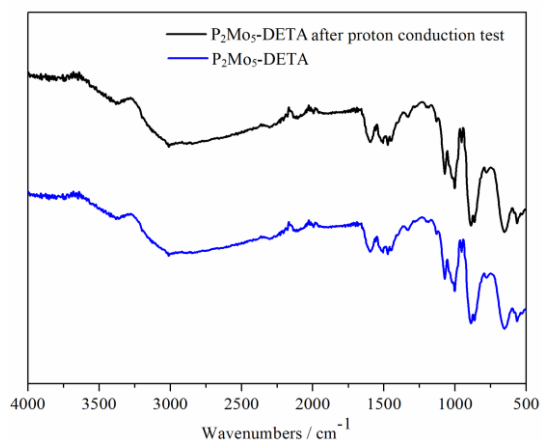

**Fig. S6** The original and after proton conduction IR spectra of **P<sub>2</sub>Mo<sub>5</sub>-DETA**.

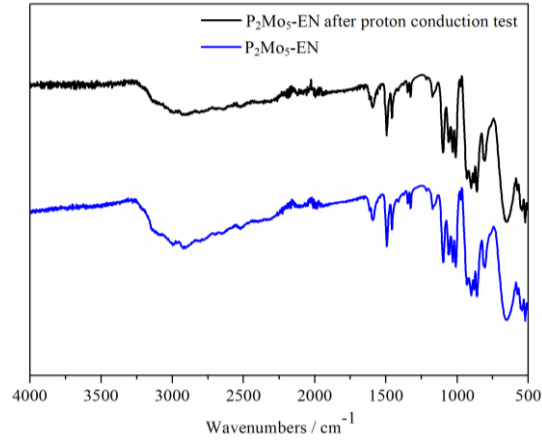

**Fig. S7** The original and after proton conduction IR spectra of **P<sub>2</sub>Mo<sub>5</sub>-EN**.

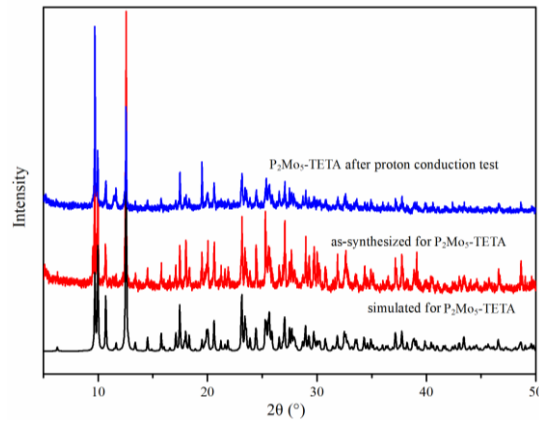

**Fig. S8** PXRD profiles of single crystal data simulation for **P<sub>2</sub>Mo<sub>5</sub>-TETA**; as-synthesized of **P<sub>2</sub>Mo<sub>5</sub>-TETA**; **P<sub>2</sub>Mo<sub>5</sub>-TETA** after proton conduction test.

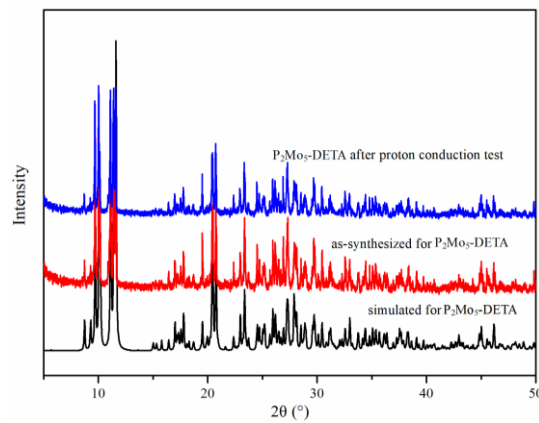

**Fig. S9** PXRD profiles of single crystal data simulation for **P<sub>2</sub>Mo<sub>5</sub>-DETA**; as-synthesized of **P<sub>2</sub>Mo<sub>5</sub>-DETA**; **P<sub>2</sub>Mo<sub>5</sub>-DETA** after proton conduction test.

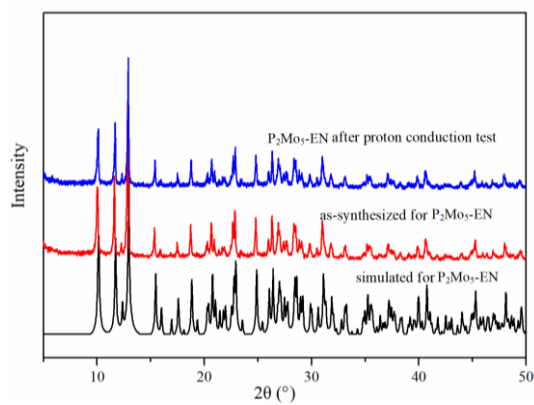

**Fig. S10** PXRD profiles of single crystal data simulation for **P<sub>2</sub>Mo<sub>5</sub>-EN**; as-synthesized of **P<sub>2</sub>Mo<sub>5</sub>-EN**; **P<sub>2</sub>Mo<sub>5</sub>-EN** after proton conduction test.

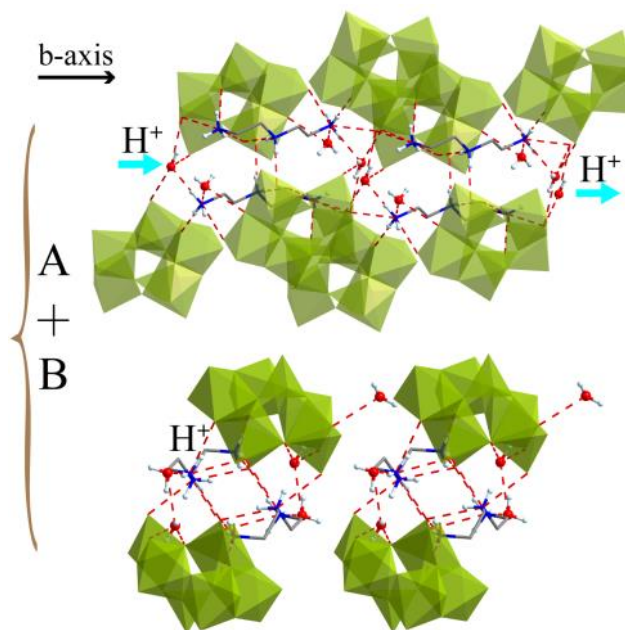

**Fig. S11** The possible proton transport pathway of A and B in adduct **P<sub>2</sub>Mo<sub>5</sub>-DETA** along the b-axis.

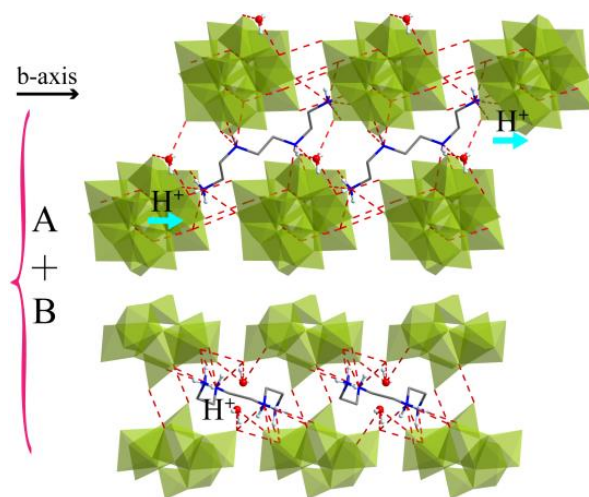

**Fig. S12** The possible proton transport pathway of A and B in adduct  $P_2Mo_5$ -TETA along the b-axis.

**Table S1 X-ray crystallographic data for P<sub>2</sub>Mo<sub>5</sub>-TETA and P<sub>2</sub>Mo<sub>5</sub>-DETA.**

| Compound                                                          | P <sub>2</sub> Mo <sub>5</sub> -TETA                                                         | P <sub>2</sub> Mo <sub>5</sub> -DETA                                                         |
|-------------------------------------------------------------------|----------------------------------------------------------------------------------------------|----------------------------------------------------------------------------------------------|
| Empirical formula                                                 | C <sub>6</sub> H <sub>26</sub> Mo <sub>5</sub> N <sub>4</sub> O <sub>24</sub> P <sub>2</sub> | C <sub>8</sub> H <sub>40</sub> Mo <sub>5</sub> N <sub>6</sub> O <sub>27</sub> P <sub>2</sub> |
| Formula weight                                                    | 1079.95                                                                                      | 1194.10                                                                                      |
| Temperature (K)                                                   | 238.0                                                                                        | 113.0                                                                                        |
| Crystal system                                                    | Triclinic                                                                                    | Triclinic                                                                                    |
| Space group                                                       | P-1                                                                                          | P-1                                                                                          |
| <i>a</i> (Å)                                                      | 9.9361(8)                                                                                    | 10.3242(14)                                                                                  |
| <i>b</i> (Å)                                                      | 10.0331(7)                                                                                   | 10.9734(15)                                                                                  |
| <i>c</i> (Å)                                                      | 14.4174(12)                                                                                  | 15.718(2)                                                                                    |
| <i>α</i> (°)                                                      | 84.088(4)                                                                                    | 95.654(6)                                                                                    |
| <i>β</i> (°)                                                      | 77.796(4)                                                                                    | 95.813(5)                                                                                    |
| <i>γ</i> (°)                                                      | 65.153(3)                                                                                    | 111.470(4)                                                                                   |
| Volume (Å <sup>3</sup> )                                          | 1274.59(18)                                                                                  | 1630.9(4)                                                                                    |
| <i>Z</i>                                                          | 2                                                                                            | 2                                                                                            |
| <i>D</i> <sub>calc</sub> /gcm <sup>-3</sup>                       | 2.814                                                                                        | 2.432                                                                                        |
| <i>μ</i> /mm <sup>-1</sup>                                        | 2.630                                                                                        | 2.076                                                                                        |
| <i>F</i> (000)                                                    | 1044                                                                                         | 1172                                                                                         |
| Reflections collected                                             | 35964                                                                                        | 41817                                                                                        |
| Independent reflections                                           | 8751 [R <sub>int</sub> = 0.0559]                                                             | 6454 [R <sub>int</sub> = 0.0384]                                                             |
| GOOF                                                              | 1.023                                                                                        | 1.091                                                                                        |
| Final <i>R</i> indexes [ <i>I</i> > 2σ( <i>I</i> )] <sup>ab</sup> | <i>R</i> <sub>1</sub> = 0.0394, <i>wR</i> <sub>2</sub> = 0.0664                              | <i>R</i> <sub>1</sub> = 0.0255, <i>wR</i> <sub>2</sub> = 0.0622                              |
| Final <i>R</i> indexes [all data]                                 | <i>R</i> <sub>1</sub> = 0.0798, <i>wR</i> <sub>2</sub> = 0.0767                              | <i>R</i> <sub>1</sub> = 0.0306, <i>wR</i> <sub>2</sub> = 0.0656                              |

---

$${}^a R_1 = \frac{\sum ||F_o| - |F_c||}{\sum |F_o|}; {}^b wR_2 = \left\{ \frac{\sum [w(F_o^2 - F_c^2)^2]}{\sum [w(F_o^2)^2]} \right\}^{1/2}$$



**Table S2 Hydrogen bond distances (Å) and angles (°) for P<sub>2</sub>Mo<sub>5</sub>-TETA.**

| D-H...A         | D-H / Å | H...A / Å | D...A / Å | D-H...A / ° |
|-----------------|---------|-----------|-----------|-------------|
| O1(W)-H1B...O1  | 0.86    | 2.737     | 2.745     | 141.60      |
| O1(W)-H1A...O6  | 0.86    | 2.361     | 2.922     | 123.20      |
| O1(W)-H1A...O14 | 0.86    | 2.376     | 2.946     | 140.56      |
| O8-H8...O12     | 0.83    | 2.059     | 2.816     | 151.56      |
| N3-H3C...O1(W)  | 0.90    | 1.778     | 2.590     | 148.78      |
| N1-H1A...O5     | 0.90    | 1.991     | 2.857     | 160.81      |
| N1-H1C...O2     | 0.90    | 2.313     | 2.977     | 130.30      |
| N1-H1C...O19    | 0.90    | 2.234     | 3.028     | 146.80      |
| N1-H1B...O15    | 0.90    | 2.076     | 2.874     | 147.21      |
| N2-H2A...O7     | 0.90    | 1.999     | 2.842     | 155.50      |
| N2-H2B...O18    | 0.90    | 2.531     | 2.933     | 107.74      |
| N2-H2B...O13    | 0.90    | 1.957     | 2.841     | 166.65      |
| N3-H3D...O11    | 0.90    | 2.022     | 2.777     | 140.63      |
| N3-H3E...O20    | 0.90    | 1.950     | 2.771     | 150.80      |
| N3-H3C...O1(W)  | 0.90    | 1.778     | 2.590     | 148.78      |
| N4-H4B...O20    | 0.90    | 2.409     | 2.968     | 120.45      |
| N4-H4B...O1     | 0.90    | 19.84     | 2.813     | 152.46      |
| N4-H1A...O23    | 0.90    | 2.042     | 2.963     | 164.31      |

**Table S3 Hydrogen bond distances (Å) and angles (°) for P<sub>2</sub>Mo<sub>5</sub>-DETA.**

| D-H...A        | D-H / Å | H...A / Å | D...A / Å | D-H...A / ° |
|----------------|---------|-----------|-----------|-------------|
| N1-H1B...O21   | 1.003   | 2.092     | 3.008     | 150.97      |
| N1-H1C...O2(W) | 0.703   | 2.028     | 2.739     | 161.60      |
| N1-H1A...O22   | 0.934   | 1.879     | 2.807     | 172.26      |
| N2-H2A...O10   | 0.910   | 2.068     | 2.782     | 134.37      |
| N2-H2A...O22   | 0.910   | 2.021     | 2.893     | 159.97      |
| N2-H2B...O22   | 0.910   | 2.543     | 2.927     | 105.89      |
| N3-H3B...O22   | 0.909   | 1.808     | 2.705     | 168.64      |
| N3-H3A...O12   | 0.910   | 2.245     | 2.859     | 124.26      |
| N3-H3C...O13   | 0.911   | 2.173     | 2.931     | 140.20      |
| N4-H4A...O23   | 0.910   | 1.850     | 2.724     | 160.39      |
| N4-H4B...O16   | 0.910   | 2.327     | 2.984     | 128.95      |
| N4-H4C...O18   | 0.910   | 2.536     | 2.963     | 109.22      |
| N5-H5C...O23   | 0.823   | 1.871     | 2.677     | 166.08      |
| N5-H5D...O6    | 0.868   | 1.942     | 2.808     | 176.39      |
| N6-H6C...O7    | 0.909   | 2.016     | 2.849     | 151.61      |
| N6-H6C...O4(W) | 0.909   | 2.586     | 2.970     | 106.11      |
| N6-H6D...O14   | 0.910   | 2.245     | 2.848     | 123.34      |
| N6-H6C...O17   | 0.911   | 1.874     | 2.784     | 178.14      |
| N6-H6D...O1(W) | 0.910   | 2.234     | 2.908     | 130.46      |
| O1W-H1WB...O14 | 0.869   | 2.068     | 2.996     | 165.77      |
| O1W-H1WA...O13 | 0.870   | 2.083     | 2.877     | 151.35      |

|                    |       |       |       |        |
|--------------------|-------|-------|-------|--------|
| O1W–H1WA...O18     | 0.870 | 2.485 | 2.966 | 115.60 |
| O2(W)–H2WA...O3(W) | 0.870 | 1.847 | 2.674 | 158.23 |
| O3W–H3WA...O11     | 0.870 | 2.151 | 2.878 | 140.78 |
| O3W–H3WB...O20     | 0.872 | 2.478 | 2.880 | 108.84 |
| O4W–H4WA...O8      | 0.830 | 1.939 | 2.765 | 173.79 |

**Table S4 Hydrogen bond distances (Å) and angles (°) for P<sub>2</sub>Mo<sub>5</sub>-EN.**

| D–H...A      | D–H / Å | H...A / Å | D...A / Å | D–H...A / ° |
|--------------|---------|-----------|-----------|-------------|
| N1–H1A...O12 | 0.89    | 1.956     | 2.085     | 159.07      |
| N1–H1B...O2  | 0.89    | 1.954     | 2.829     | 167.58      |
| N1–H1C...O7  | 0.89    | 2.495     | 2.952     | 112.42      |
| N1–H1C...O11 | 0.89    | 2.149     | 3.017     | 164.92      |
| N2–H2A...O4  | 0.89    | 2.207     | 2.937     | 139.12      |
| N2–H2A...O9  | 0.89    | 2.169     | 2.957     | 147.41      |
| N2–H2B...O11 | 0.89    | 2.168     | 2.912     | 140.70      |
| N2–H2C...O6  | 0.89    | 2.017     | 2.904     | 174.18      |
| O1–H1...O4   | 0.82    | 1.868     | 2.26      | 153.03      |

**Table S5 The short O...O distances between adjacent P<sub>2</sub>Mo<sub>5</sub> anions in P<sub>2</sub>Mo<sub>5</sub>-EN.**

| Atoms involved | Length (Å) | Atoms involved | Length (Å) |
|----------------|------------|----------------|------------|
| O1...O4        | 2.626      | O11...O11      | 2.915      |
| O7...O10       | 2.943      |                |            |

**Table S6 Compare proton conductivity of P<sub>2</sub>Mo<sub>5</sub>-EN with that of other conductors under similar conditions.**

| POM-based conductors                                                                                                                                                                                                                                                           | $\sigma$ (S cm <sup>-1</sup> )           | Tested conditions | Ref.      |
|--------------------------------------------------------------------------------------------------------------------------------------------------------------------------------------------------------------------------------------------------------------------------------|------------------------------------------|-------------------|-----------|
| <b>P<sub>2</sub>Mo<sub>5</sub>-EN</b>                                                                                                                                                                                                                                          | $1.13 \times 10^{-2}$                    | 65 °C and 95% RH  | This work |
| [H <sub>3</sub> O][VO <sub>2</sub> ] <sub>3</sub> (SeO <sub>3</sub> ) <sub>2</sub> ]                                                                                                                                                                                           | $2.95 \times 10^{-2}$ [100] direction    | 60 °C and 98% RH  | 1         |
| [H <sub>3</sub> O][VO <sub>2</sub> ] <sub>3</sub> (SeO <sub>3</sub> ) <sub>2</sub> ]                                                                                                                                                                                           | $4.07 \times 10^{-2}$ [001] direction    | 60 °C and 98% RH  | 1         |
| [Cu(en) <sub>2</sub> (H <sub>2</sub> O)] <sub>2</sub> {[Cu(en)] <sub>4</sub> [Cu(en) <sub>2</sub> ] <sub>5</sub> {[Cu(en) <sub>2</sub> KNb <sub>24</sub> O <sub>72</sub> H <sub>10</sub> ] <sub>2</sub> }·6en·70H <sub>2</sub> O                                               | $1.35 \times 10^{-3}$                    | 85 °C and 98% RH  | 2         |
| [Cd(H <sub>2</sub> O) <sub>2</sub> DABT] <sub>4</sub> [Cd(H <sub>7</sub> P <sub>4</sub> Mo <sub>6</sub> -O <sub>31</sub> ) <sub>2</sub> ]·19H <sub>2</sub> O                                                                                                                   | $1.35 \times 10^{-3}$                    | 60 °C and 98% RH  | 3         |
| (C <sub>2</sub> H <sub>5</sub> OH)(C <sub>3</sub> H <sub>5</sub> N <sub>2</sub> ) <sub>6</sub> [Co <sub>3</sub> (H <sub>6</sub> P <sub>4</sub> Mo <sub>6</sub> -O <sub>31</sub> ) <sub>2</sub> ]·H <sub>2</sub> O                                                              | $3.78 \times 10^{-3}$                    | 60 °C and 98% RH  | 3         |
| [Cu <sub>2</sub> (H <sub>2</sub> O) <sub>2</sub> (L1) <sub>3</sub> ][PMo <sup>VI</sup> <sub>11</sub> Mo <sup>V</sup> O <sub>40</sub> ]                                                                                                                                         | $2.8 \times 10^{-4}$                     | 65 °C, 95% RH     | 4         |
| (H <sub>2</sub> L <sub>2</sub> ) <sub>0.5</sub> [(Cu <sup>I</sup> L <sub>2</sub> ) <sub>2</sub> (PMo <sub>12</sub> O <sub>40</sub> )]·H <sub>2</sub> O                                                                                                                         | $1.9 \times 10^{-4}$                     | 65 °C, 95% RH     | 4         |
| [Sr(DMPH <sub>2</sub> IDC) <sub>2</sub> ] <sub>n</sub>                                                                                                                                                                                                                         | $0.92 \times 10^{-3}$ S·cm <sup>-1</sup> | 100 °C and 98% RH | 5         |
| H <sub>3</sub> [(CH <sub>3</sub> ) <sub>4</sub> N] <sub>14</sub> [NaSm(PW <sub>11</sub> O <sub>39</sub> ) <sub>3</sub> ]·18 H <sub>2</sub> O                                                                                                                                   | $4.7 \times 10^{-3}$                     | 85 °C, 98% RH     | 6         |
| (TMA) <sub>14</sub> H <sub>2</sub> [Ce <sup>III</sup> (H <sub>2</sub> O) <sub>6</sub> ]{[Ce <sup>IV</sup> <sub>7</sub> Ce <sup>III</sup> <sub>3</sub> O <sub>6</sub> (OH) <sub>6</sub> (CO <sub>3</sub> )(H <sub>2</sub> O) <sub>11</sub> ]}[(P <sub>2</sub> W <sub>16</sub> - | $2.65 \times 10^{-3}$                    | 100 °C, 98% RH    | 7         |

|                                                                                                                                                                            |                       |              |    |
|----------------------------------------------------------------------------------------------------------------------------------------------------------------------------|-----------------------|--------------|----|
| $\text{O}_{59}]_3 \cdot 41\text{H}_2\text{O}$                                                                                                                              |                       |              |    |
| $[\{\text{Cu}(\text{pip})_2\}_2\{\text{La}_{29}\text{Ge}_{10}\text{W}_{106}\text{O}_{406}\text{-(OH)}_4(\text{H}_2\text{O})_{28}\}]^{49-}$                                 | $5.3 \times 10^{-3}$  | 85°C, 98% RH | 8  |
| $[\text{Co}(4,4'\text{-bipy})(\text{H}_2\text{O})_4][\text{Co}(4,4'\text{-bipy})\text{H}_2(\text{H}_2\text{O})_4] \cdot 2(\text{H}_3\text{bmt}) \cdot 6\text{H}_2\text{O}$ | $9.87 \times 10^{-3}$ | 85°C, 98% RH | 9  |
| $[\text{Nd}_3(\text{H}_2\text{O})_{22}][\text{P}_2\text{W}_{15}\text{Ta}_3\text{O}_{62}] \cdot n\text{H}_2\text{O}$                                                        | $9.88 \times 10^{-3}$ | 95°C, 98% RH | 10 |
| JUK13-SO <sub>3</sub> H                                                                                                                                                    | $3.80 \times 10^{-5}$ | 65°C, 90% RH | 11 |
| $[\text{Zn}(\text{Hssa})(1,4\text{-bib}) \cdot \text{H}_2\text{O}]_n$                                                                                                      | $3.45 \times 10^{-5}$ | 60°C, 95% RH | 12 |
| $(\text{C}_5\text{H}_{10}\text{NO}_2)\text{Ga}_4(\text{PO}_4)_4\text{F} \cdot 3\text{H}_2\text{O}$                                                                         | $8.89 \times 10^{-4}$ | 85°C, 95% RH | 13 |

- 1 H. Y. Sun, S. H. Sun, B. Hu, L. K. Gong, Y. M. Zou, J. L. Li, M. L. Feng and X. Y. Huang, Anisotropic proton conduction realized by a layered vanadium selenite single crystal, *Inorg. Chem. Front.*, 2020, 7, 1699–1703.
- 2 Z. K. Zhu, L. D. Lin, J. Zhang, X. X. Li, Y. Q. Sun and S. T. Zhen, A rare 4-connected neb-type 3D chiral polyoxometalate framework based on  $\{\text{KNb}_2\text{O}_7\}$  clusters, 10.1039/d0qi00927j.
- 3 Z. Y. Du, Z. Chen, R. K. Kang, Y. M. Han, J. Ding, J. P. Cao, W. Jiang, M. Fang, H. Mei and Y. Xu, Two 2D Layered  $\text{P}_4\text{Mo}_6$  Clusters with Potential Bifunctional Properties: Proton Conduction and  $\text{CO}_2$  Photoreduction, [org/10.1021/acs.inorgchem.0c01941](https://doi.org/10.1021/acs.inorgchem.0c01941).
- 4 K. Lu, A. L. Pelaez, L. C. Wu, Y. Cao, C. H. Zhu, and H. Fu, Ionothermal Synthesis of Five Keggin-Type Polyoxometalate-Based Metal–Organic Frameworks, *Inorg. Chem.*, 2019, **58**, 1794–1805.
- 5 X. X. Xie, Z. H. Zhang, J. Zhang, L. F. Hou, Z. F. Li and G. Li, Impressive Proton Conductivities of Two Highly Stable Metal–Organic Frameworks Constructed by Substituted Imidazolidicarboxylates, *Inorg. Chem.* 2019, **58**, 5173–5182.
- 6 Z. Li, L. D. Lin, D. Zhao, Y. Q. Sun, and S. T. Zheng, A Series of Unprecedented Linear Mixed-Metal-Substituted Polyoxometalate Trimers: Syntheses, Structures, Luminescence, and Proton Conductivity Properties, *Eur. J. Inorg. Chem.* 2019, 437–441.
- 7 P. T. Ma, R. Wan, Y. Y. Wang, F. Hu, D. D. Zhang, J. Y. Niu, and J. P. Wang, Coordination-Driven Self-Assembly of a 2D Graphite-Like Framework Constructed from High-Nuclear  $\text{Ce}_{10}$  Cluster Encapsulated Polyoxotungstates, *Inorg. Chem.* 2016, **55**, 918–924.
- 8 Z. Li, X. X. Li, T. Yang, Z. W. Cai, S. T. Zheng, Four-Shell Polyoxometalates Featuring High-Nuclearity  $\text{Ln}_{26}$  Clusters: Structural Transformations of Nanoclusters into Frameworks Triggered by Transition-Metal Ions, *Angew. Chem.* 2017, **129**, 2708 – 2713; *Angew. Chem. Int. Ed.* 2017, **56**, 2664.
- 9 L. Feng, Z. Q. Pan, H. Zhou, M. Zhou and H. B. Hou, Water-mediated proton conduction in Ni(ii) and Co(ii) benzenetriphosphonates, *Dalton Trans.*, 2019, **48**, 16493–16496.
- 10 Q. P. Peng, S. J. Li, R. Y. Wang, S. S. Xia, L. H. Xie, J. X. Zhai, J. Zhang, Q. Y. Zhao and X. N. Chen, Lanthanide derivatives of Ta/W mixed-addendum POMs as proton-conducting materials, *Dalton Trans.*, 2017, **46**, 4157–4160.
- 11 M. Szufla, K. Roztocki, A. Krawczuk and D. Matoga, One-step introduction of terminal sulfonic groups into a proton-conducting metal–organic framework by concerted deprotonation–metalation–hydrolysis reaction, *Dalton Trans.*, 2020, **49**, 9953–9956.
- 12 T. Y. Xu, H. J. Nie, J. M. Li and Z. F. Shi, Highly selective sensing of  $\text{Fe}^{3+}/\text{Hg}^{2+}$  and proton conduction using two fluorescent Zn(ii) coordination polymers, *Dalton Trans.*, 2020, **49**, 11129–11141.
- 13 L. J. Huang, L. Wang, Y. Zhao, L. Huang, J. Bi, G. H. Zou, Z. E. Lin and D. J. Gao, Two amino acid-templated metal phosphates: surfactant-thermal synthesis, water stability, and proton conduction, *Dalton Trans.*, 2020, **49**, 5440–5444.

**Table S7** The relatively short  $\text{O} \cdots \text{O}$  distances between adjacent  $\text{P}_2\text{Mo}_5$  anions in the A pathway of  $\text{P}_2\text{Mo}_5$ -TETA, where the oxygen atoms involved can provide potential proton hop sites.

| Atoms involved   | Length (Å) | Atoms involved  | Length (Å) |
|------------------|------------|-----------------|------------|
| O1 $\cdots$ O20  | 2.882      | O19 $\cdots$ O2 | 2.936      |
| O18 $\cdots$ O19 | 3.025      |                 |            |
